# Supplementary material for: Efficacy and Safety of Combined Brain Stereotactic Radiotherapy and Immune Checkpoint Inhibitors in Non-Small-Cell Lung Cancer with Brain Metastases
Source: MDPI journal article supplement (doi:10.3390/biomedicines10092249), 2022-09-10
Supplement: s1 [file s1]

**Table S1:** PD-1 pathway inhibitor regarding the timing of immunotherapy and radiotherapy

|                              | Number | %    |
|------------------------------|--------|------|
| <b>SRT before IT</b>         | 18     | 21.4 |
| Nivolumab                    | 10     | 55.6 |
| Pembrolizumab                | 7      | 38.9 |
| Durvalumab                   | 0      | 0    |
| Atezolizumab                 | 1      | 5.5  |
| <b>Concurrent SRT and IT</b> | 46     | 54.8 |
| Nivolumab                    | 27     | 58.7 |
| Pembrolizumab                | 15     | 32.6 |
| Durvalumab                   | 3      | 6.5  |
| Atezolizumab                 | 1      | 2.2  |
| <b>SRT after IT</b>          | 20     | 23.8 |
| Nivolumab                    | 6      | 30   |
| Pembrolizumab                | 7      | 35   |
| Durvalumab                   | 7      | 35   |
| Atezolizumab                 | 0      | 0    |

**Table S2:** Multivariate analysis for Regional Progression-Free Interval

| MULTIVARIATE |                                          | R-PFI |      |               |        |
|--------------|------------------------------------------|-------|------|---------------|--------|
| Factors      |                                          | n     | HR   | CI            | Pvalue |
| Sex          | Female                                   | 37    | 1    |               | 0.113  |
|              | Male                                     | 47    | 0.62 | [0.34 ; 1.12] |        |
| Age at SRT   | < 60 y                                   | 26    | 1    |               | 0.163  |
|              | ≥ 60 y                                   | 58    | 0.62 | [0.32 ; 1.2]  |        |
| Treatment    | Conc SRT - IT                            | 46    | 1    |               | 0.114  |
|              | SRT before IT                            | 18    | 1.57 | [0.77 ; 3.2]  |        |
|              | SRT after IT                             | 20    | 2.33 | [1.04 ; 5.24] |        |
| IT line      | 1                                        | 28    | 1    |               | 0.006  |
|              | ≥2                                       | 23    | 1.78 | [0.86 ; 3.7]  |        |
|              | Consolidation<br>("Durvalumab<br>group") | 10    | 0.35 | [0.1 ; 1.17]  |        |

HR, Hazard Ratio; CI, confidence interval; SRT, stereotactic radiotherapy; IT, immunotherapy; y, years
